# Supplementary material for: Impact of Multiple COVID-19 Waves on Gynaecological Cancer Services in the UK
Source: Cancers (Basel). 2023 Feb 16;15(4):1273. doi: 10.3390/cancers15041273 (PMC9953843; doi:10.3390/cancers15041273)
Supplement: Supplementary file 1 [file cancers-15-01273-s001.zip › cancers-2114294-supplementary.pdf]

Table S1: COVID-19 Survey of Gynae-oncology Centres and Units

|                                                                                                                                                                                                                                        |                                        |                                      |                  |
|----------------------------------------------------------------------------------------------------------------------------------------------------------------------------------------------------------------------------------------|----------------------------------------|--------------------------------------|------------------|
| <b>Do you represent a Centre or Unit</b>                                                                                                                                                                                               | <b>Centre <input type="checkbox"/></b> | <b>Unit <input type="checkbox"/></b> |                  |
| Name of Centre or Unit                                                                                                                                                                                                                 |                                        |                                      |                  |
| <b>Regarding staffing, have you experienced significant reduction in staff numbers</b>                                                                                                                                                 | <b>Yes <input type="checkbox"/></b>    | <b>No <input type="checkbox"/></b>   |                  |
| <b>If Yes, is this due to COVID related sickness or redeployment or both (please enter/tick accordingly). For example if Junior doctor staff numbers are reduced from 10 to 7 (i.e. by 30%) then enter 30 in the % reduced column.</b> | <b>COVID</b>                           | <b>Redeployment</b>                  | <b>% reduced</b> |
| Junior doctor staff numbers                                                                                                                                                                                                            | <input type="checkbox"/>               | <input type="checkbox"/>             |                  |
| GO Sub-specialty Trainee numbers (hospitals where applicable)                                                                                                                                                                          | <input type="checkbox"/>               | <input type="checkbox"/>             |                  |
| Consultant staff numbers                                                                                                                                                                                                               | <input type="checkbox"/>               | <input type="checkbox"/>             |                  |
| CNS staff numbers                                                                                                                                                                                                                      | <input type="checkbox"/>               | <input type="checkbox"/>             |                  |
| <b>Regarding MDT functioning, have you implemented any changes</b>                                                                                                                                                                     | <b>Yes <input type="checkbox"/></b>    | <b>No <input type="checkbox"/></b>   |                  |
| If Yes, tick all that apply                                                                                                                                                                                                            |                                        |                                      |                  |
| Moved to Virtual MDT                                                                                                                                                                                                                   | <input type="checkbox"/>               |                                      |                  |
| Mixed virtual and face to face MDT                                                                                                                                                                                                     | <input type="checkbox"/>               |                                      |                  |
| Suspended MDT                                                                                                                                                                                                                          | <input type="checkbox"/>               |                                      |                  |
| Reduced MDT frequency                                                                                                                                                                                                                  | <input type="checkbox"/>               |                                      |                  |
| Reduced number of attendees                                                                                                                                                                                                            | <input type="checkbox"/>               | % reduced _____                      |                  |
| <b>Regarding Out-patient clinics</b>                                                                                                                                                                                                   |                                        |                                      |                  |
| What proportion of your out-patient clinic is remote consultation (telephone/ video)                                                                                                                                                   |                                        |                                      | _____            |
| <b>Please answer questions below in terms of Gynae Oncology related activity: (for example if number of theatre sessions are reduced from 10 to 7 (i.e. by 30%) then enter 30 in the % reduced column.</b>                             |                                        |                                      | <b>% reduced</b> |
| Re theatre time, how much reduction in theatre time has occurred? (If not reduced enter '0')                                                                                                                                           |                                        |                                      | _____            |
| What is the proportion of surgical cases postponed (if no cases postponed, enter '0')                                                                                                                                                  |                                        |                                      | _____            |
| Re Medical Oncology access/capacity, how much is this reduced by? (If not reduced enter '0', If unknown enter NK)                                                                                                                      |                                        |                                      | _____            |
| Re Clinical Oncology access/capacity, how much is this reduced by? (If not reduced enter '0', If unknown enter NK)                                                                                                                     |                                        |                                      | _____            |
| Re Radiology access/capacity, how much is this reduced by? (If not reduced enter '0', If unknown enter NK)                                                                                                                             |                                        |                                      | _____            |
| Re Pathology access/capacity, how much is this reduced by? (If not reduced enter '0', If unknown enter NK)                                                                                                                             |                                        |                                      | _____            |
| Re Palliative care access/capacity, how much is this reduced by? (If not reduced enter '0', If unknown enter NK)                                                                                                                       |                                        |                                      | _____            |
| How much have your rapid access referrals dropped by? (If not reduced enter '0')                                                                                                                                                       |                                        |                                      | _____            |
| How much has your weekly MDT list/workload reduced by? (If not reduced enter '0')                                                                                                                                                      |                                        |                                      | _____            |
| <b>Have you needed to move activity off site to another hospital (e.g. Independent sector)</b>                                                                                                                                         | <b>Yes</b>                             | <b>No</b>                            |                  |
| Moved operating lists                                                                                                                                                                                                                  | <input type="checkbox"/>               | <input type="checkbox"/>             |                  |
| Moved Clinics                                                                                                                                                                                                                          | <input type="checkbox"/>               | <input type="checkbox"/>             |                  |
| Moved other activity                                                                                                                                                                                                                   | <input type="checkbox"/>               | <input type="checkbox"/>             |                  |
| Not yet moved but are planning to move                                                                                                                                                                                                 | <input type="checkbox"/>               | <input type="checkbox"/>             |                  |
| Do you need to go via a central hub or committee to access operating                                                                                                                                                                   | <input type="checkbox"/>               | <input type="checkbox"/>             |                  |
| <b>Are you undertaking Minimal access procedures</b>                                                                                                                                                                                   | <b>Yes <input type="checkbox"/></b>    | <b>No <input type="checkbox"/></b>   |                  |
| <b>Please use the box below to provide any free text comments.</b>                                                                                                                                                                     |                                        |                                      |                  |
|                                                                                                                                                                                                                                        |                                        |                                      |                  |
